# Supplementary material
Source: MDPI journal article supplement (https://www.mdpi.com/2571-5577/7/5/82)
Supplement: s1 [file s1]

## **Research on experts' opinions on the impact of selected factors on the level of Poland's energy security index**

The survey included three forms containing factors used to analyze what the level of the energy security index will be if the legal provisions in force in Poland affect security in a way: neutral N, negative Z, positive P?

The energy security index takes values from the set: low, medium, high, where low means a negative assessment, high a positive assessment, medium a neutral assessment.

Factors included in the survey:

Primary energy - energy obtained directly from natural resources (renewable and non-renewable). The energy demand assumed in the survey may be:

- Low, e.g. due to an increase in the level of energy efficiency, the use of energy-efficient machines and devices in industry, or an increase in energy prices
- Medium - remaining at the current level.
- High – due to increased demand for energy caused by, for example, dynamic economic growth, natural increase or falling energy prices.

REE – rare earth elements, necessary in the process of producing renewable energy technologies such as wind turbines and energy storage. They are classified as critical raw materials due to their limited availability and lack of substitution. The demand for REE assumed in the survey may be:

- Low, e.g. due to a decline in interest in renewable energy sources such as wind energy or energy storage.
- Medium - remaining at the current level.
- High – due to the increased demand for REE caused by the dynamic development of renewable energy sources or economic growth consuming most of the REE available on the market.

In the form, select the level of Poland's energy security index depending on the impact of legal regulations and the demand for REE and primary energy.

The impact of legal regulations is neutral (N) and:

| Primary energy demand |     | Demand for REE | Energy security index    |                          |                          |
|-----------------------|-----|----------------|--------------------------|--------------------------|--------------------------|
|                       |     |                | N                        | S                        | W                        |
| M (low)               | and | M (low)        | <input type="checkbox"/> | <input type="checkbox"/> | <input type="checkbox"/> |
| M (low)               | and | S (medium)     | <input type="checkbox"/> | <input type="checkbox"/> | <input type="checkbox"/> |
| M (low)               | and | D (high)       | <input type="checkbox"/> | <input type="checkbox"/> | <input type="checkbox"/> |
| S (medium)            | and | M (low)        | <input type="checkbox"/> | <input type="checkbox"/> | <input type="checkbox"/> |
| S (medium)            | and | D (high)       | <input type="checkbox"/> | <input type="checkbox"/> | <input type="checkbox"/> |
| D (high)              | and | M (low)        | <input type="checkbox"/> | <input type="checkbox"/> | <input type="checkbox"/> |
| D (high)              | and | D (high)       | <input type="checkbox"/> | <input type="checkbox"/> | <input type="checkbox"/> |
| S (medium)            | and | S (medium)     | <input type="checkbox"/> | <input type="checkbox"/> | <input type="checkbox"/> |
| D (high)              | and | S (medium)     | <input type="checkbox"/> | <input type="checkbox"/> | <input type="checkbox"/> |

The impact of legal regulations is positive (P) and:

| Primary energy demand |     | Demand for REE | Energy security index                 |                                       |                                       |
|-----------------------|-----|----------------|---------------------------------------|---------------------------------------|---------------------------------------|
| M (low)               | and | M (low)        | <div>N</div> <input type="checkbox"/> | <div>S</div> <input type="checkbox"/> | <div>W</div> <input type="checkbox"/> |
| M (low)               | and | S (medium)     | <div>N</div> <input type="checkbox"/> | <div>S</div> <input type="checkbox"/> | <div>W</div> <input type="checkbox"/> |
| M (low)               | and | D (high)       | <div>N</div> <input type="checkbox"/> | <div>S</div> <input type="checkbox"/> | <div>W</div> <input type="checkbox"/> |
| S (medium)            | and | M (low)        | <div>N</div> <input type="checkbox"/> | <div>S</div> <input type="checkbox"/> | <div>W</div> <input type="checkbox"/> |
| S (medium)            | and | D (high)       | <div>N</div> <input type="checkbox"/> | <div>S</div> <input type="checkbox"/> | <div>W</div> <input type="checkbox"/> |
| D (high)              | and | M (low)        | <div>N</div> <input type="checkbox"/> | <div>S</div> <input type="checkbox"/> | <div>W</div> <input type="checkbox"/> |
| D (high)              | and | D (high)       | <div>N</div> <input type="checkbox"/> | <div>S</div> <input type="checkbox"/> | <div>W</div> <input type="checkbox"/> |
| S (medium)            | and | S (medium)     | <div>N</div> <input type="checkbox"/> | <div>S</div> <input type="checkbox"/> | <div>W</div> <input type="checkbox"/> |
| D (high)              | and | S (medium)     | <div>N</div> <input type="checkbox"/> | <div>S</div> <input type="checkbox"/> | <div>W</div> <input type="checkbox"/> |

Negative impact of legal regulations (Z) and:

| Primary energy demand |     | Demand for REE | Energy security index                            |                                                  |                                                  |
|-----------------------|-----|----------------|--------------------------------------------------|--------------------------------------------------|--------------------------------------------------|
| M (low)               | and | M (low)        | <div>N</div> <div><input type="checkbox"/></div> | <div>S</div> <div><input type="checkbox"/></div> | <div>W</div> <div><input type="checkbox"/></div> |
| M (low)               | and | S (medium)     | <div>N</div> <div><input type="checkbox"/></div> | <div>S</div> <div><input type="checkbox"/></div> | <div>W</div> <div><input type="checkbox"/></div> |
| M (low)               | and | D (high)       | <div>N</div> <div><input type="checkbox"/></div> | <div>S</div> <div><input type="checkbox"/></div> | <div>W</div> <div><input type="checkbox"/></div> |
| S (medium)            | and | M (low)        | <div>N</div> <div><input type="checkbox"/></div> | <div>S</div> <div><input type="checkbox"/></div> | <div>W</div> <div><input type="checkbox"/></div> |
| S (medium)            | and | D (high)       | <div>N</div> <div><input type="checkbox"/></div> | <div>S</div> <div><input type="checkbox"/></div> | <div>W</div> <div><input type="checkbox"/></div> |
| D (high)              | and | M (low)        | <div>N</div> <div><input type="checkbox"/></div> | <div>S</div> <div><input type="checkbox"/></div> | <div>W</div> <div><input type="checkbox"/></div> |
| D (high)              | and | D (high)       | <div>N</div> <div><input type="checkbox"/></div> | <div>S</div> <div><input type="checkbox"/></div> | <div>W</div> <div><input type="checkbox"/></div> |
| S (medium)            | and | S (medium)     | <div>N</div> <div><input type="checkbox"/></div> | <div>S</div> <div><input type="checkbox"/></div> | <div>W</div> <div><input type="checkbox"/></div> |
| D (high)              | and | S (medium)     | <div>N</div> <div><input type="checkbox"/></div> | <div>S</div> <div><input type="checkbox"/></div> | <div>W</div> <div><input type="checkbox"/></div> |
